# Supplementary material for: Bridging Policy and Practice: Reforming Prior Authorization in Kidney Care
Source: PubMed Central journal article supplement (PMC11793180; doi:10.34067/kid.0000000657), 2024-11-19
Supplement: kidney360-6-156-s001.pdf [file kidney360-6-156-s001.pdf]

## ASN Journal Disclosure Form

As per ASN journal policy, I have disclosed any financial relationships or commitments I have held in the past 36 months as included below. I have listed my Current Employer below to indicate there is a relationship requiring disclosure. If no relationship exists, my Current Employer is not listed.

A. Beckrich reports the following:

Employer: Self - Renal Physicians Association (501c6) staff; Spouse - Freddie Mac

I understand that the information above will be published within the journal article, if accepted, and that failure to comply and/or to accurately and completely report the potential financial conflicts of interest could lead to the following: 1) Prior to publication, article rejection, or 2) Post-publication, sanctions ranging from, but not limited to, issuing a correction, reporting the inaccurate information to the authors' institution, banning authors from submitting work to ASN journals for varying lengths of time, and/or retraction of the published work.

Name: Amy Beckrich

Manuscript ID: K360-2024-000849R1

Manuscript Title: Bridging Policy and Practice: Reforming Prior Authorization in Kidney Care

Date of Completion: October 22, 2024

Disclosure Updated Date: October 22, 2024

## ASN Journal Disclosure Form

As per ASN journal policy, I have disclosed any financial relationships or commitments I have held in the past 36 months as included below. I have listed my Current Employer below to indicate there is a relationship requiring disclosure. If no relationship exists, my Current Employer is not listed.

R. Blaser reports the following:

Employer: Renal Physicians Association

I understand that the information above will be published within the journal article, if accepted, and that failure to comply and/or to accurately and completely report the potential financial conflicts of interest could lead to the following: 1) Prior to publication, article rejection, or 2) Post-publication, sanctions ranging from, but not limited to, issuing a correction, reporting the inaccurate information to the authors' institution, banning authors from submitting work to ASN journals for varying lengths of time, and/or retraction of the published work.

Name: Robert Blaser

Manuscript ID: K360-2024-000849R1

Manuscript Title: Bridging Policy and Practice: Reforming Prior Authorization in Kidney Care

Date of Completion: October 23, 2024

Disclosure Updated Date: October 23, 2024

## ASN Journal Disclosure Form

As per ASN journal policy, I have disclosed any financial relationships or commitments I have held in the past 36 months as included below. I have listed my Current Employer below to indicate there is a relationship requiring disclosure. If no relationship exists, my Current Employer is not listed.

A. Shah reports the following:

Employer: Brown Physicians Inc; Consultancy: Otsuka, Calliditas; and Advisory or Leadership Role: American College of Physicians Rhode Island Chapter Governors Advisory Council ; American Society of Nephrology Policy and Advocacy Committee; Renal Physicians Association Government Affairs Committee; Renal Physicians Association Policy Advocacy Leadership Steering Committee.

I understand that the information above will be published within the journal article, if accepted, and that failure to comply and/or to accurately and completely report the potential financial conflicts of interest could lead to the following: 1) Prior to publication, article rejection, or 2) Post-publication, sanctions ranging from, but not limited to, issuing a correction, reporting the inaccurate information to the authors' institution, banning authors from submitting work to ASN journals for varying lengths of time, and/or retraction of the published work.

Name: Ankur Shah

Manuscript ID: K360-2024-000849R1

Manuscript Title: Bridging Policy and Practice: Reforming Prior Authorization in Kidney Care,

Date of Completion: November 5, 2024

Disclosure Updated Date: November 5, 2024
